# Supplementary material for: Molecular and pore-scale structure evolution in amorphous solid water
Source: Royal Society of Chemistry journal article supplement (doi:10.1039/d5cp03851k), 2025-11-28
Supplement: d5cp03851k1.pdf [file d5cp03851k1.pdf]

# Molecular and Pore-Scale Structure Evolution in Amorphous Solid Water Supplementary Information

Zachary Amato,<sup>†,‡</sup> Thomas F. Headen,<sup>†</sup> Sabrina Gaertner,<sup>‡</sup> Pierre Ghesquiere,<sup>‡</sup>  
Tristan G. A. Youngs,<sup>†</sup> Daniel T. Bowron,<sup>†</sup> Leide P. Cavalcanti,<sup>†</sup> Sarah E.  
Rogers,<sup>†</sup> Natalia Pascual,<sup>‡</sup> Olivier Auriacombe,<sup>‡</sup> Ellen Daly,<sup>‡</sup> Rachael R. Hamp,<sup>‡</sup>  
Catherine R. Hill,<sup>‡</sup> Ragesh Kumar TP,<sup>‡</sup> and Helen J. Fraser<sup>\*,‡</sup>

<sup>†</sup>*ISIS Facility, Rutherford Appleton Laboratory, Harwell Oxford, Didcot, Oxon OX11 0QX,  
United Kingdom.*

<sup>‡</sup>*Department of Physical Sciences, The Open University, Walton Hall, Milton Keynes MK7  
6AA, United Kingdom.*

E-mail: zachary.amato@stfc.ac.uk

Figure S1 shows the SANS2d intensity as a function of  $Q$  curves throughout the annealing of each sample.

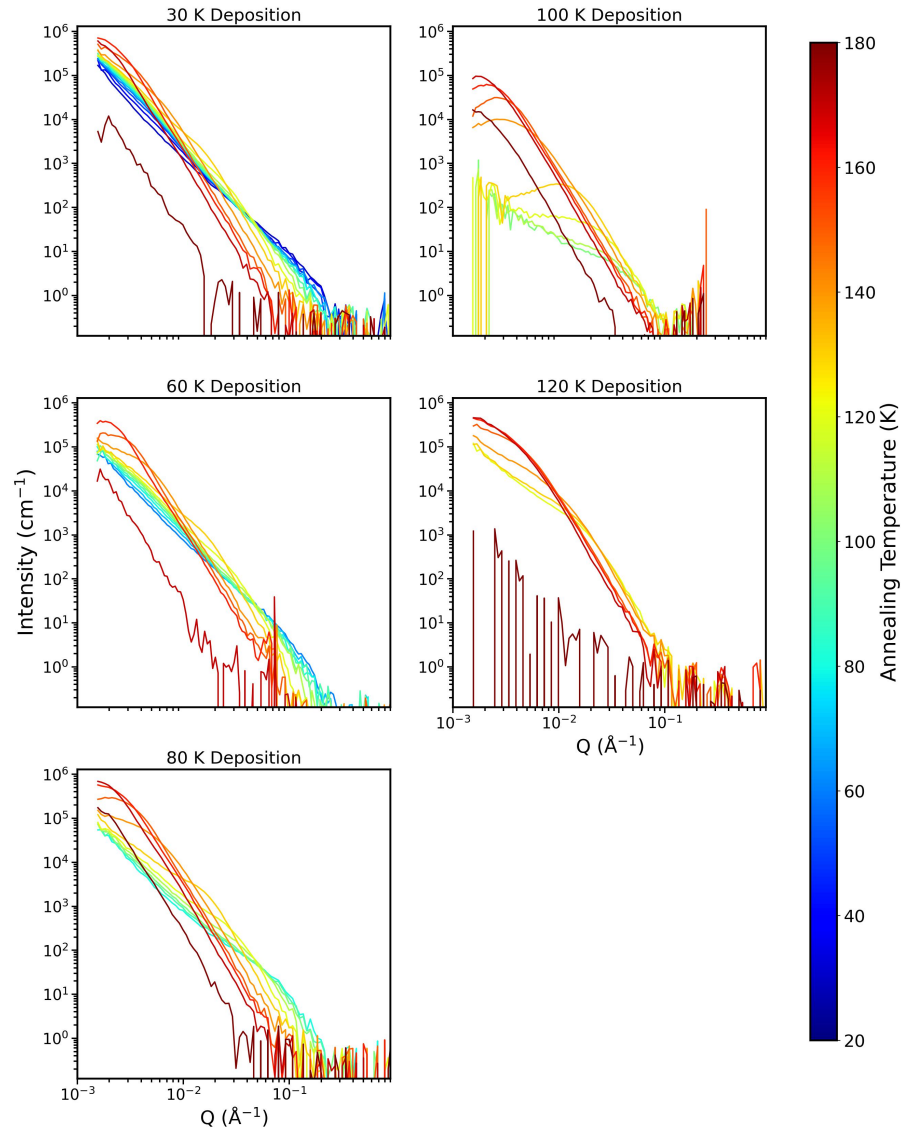

Figure S1: Intensity as a function of  $Q$  for the raw SANS2D data of every sample, with the respective deposition temperature written above the plots. Trace colours represent the annealing temperature shown by the colourbar on the right hand side.
